# Supplementary material for: pTau217 in Admixed South American Populations: Implications for Alzheimer’s Disease Diagnosis in Brazil and Argentina
Source: Research Square preprint supplement (doi:10.21203/rs.3.rs-8216169/v1), 2025-12-12
Supplement: Supplementary file 1 [file 831234b6ae942945f6175549.pdf]

## Supplementary Material

### Methods

#### Participants

Cog-Aging-Study–Brazil. Cog-Aging-Study is a longitudinal cohort established at the Health Reference Centre for Older Adults, University Hospital, Universidade Federal de Minas Gerais (UFMG), Belo Horizonte, Brazil. Recruitment was conducted through community-based senior socialization groups and referrals from the Geriatric Service of the University Hospital, which receives older adults referred by primary healthcare centers from across the city of Belo Horizonte. Eligible participants were  $\geq 60$  years of age and native Portuguese speakers. Exclusion criteria were cognitive impairment due to non-Alzheimer's dementia, severe major depressive or other psychiatric disorders, hydrocephalus, intracranial mass, history of head trauma, Parkinson's disease, active neoplasm, severe frailty, significant mobility limitations, serious visual or hearing impairment, delirium, active inflammatory disease, or ongoing oncologic treatment.

A total of 353 participants with varying levels of cognitive performance were enrolled and followed annually. All participants underwent a comprehensive and standardised research protocol, including clinical and neuropsychological evaluations conducted by a geriatrician and/or a geriatric psychiatrist. Cognitive assessments included the Mini-Mental State Examination (MMSE), Consortium to Establish a Registry for Alzheimer's Disease (CERAD) battery, and the Frontal Assessment Battery (FAB). Functional status was evaluated using the Functional Activities Questionnaire (FAQ) and the Clinical Dementia Rating (CDR) scale. The neuropsychological battery used in this study, previously validated for the assessment of cognitive performance in Brazilian populations with comparable characteristics<sup>1</sup>, included Mattis Dementia Rating Scale, Rey Auditory Verbal Learning Test (RAVLT), Stick Design Test (SDT), Five Digit Test (FDT), TNLIN, Verbal Fluency Test, Wechsler Adult Intelligence Scale/Wechsler Abbreviated Scale of Intelligence (WAIS/WASI), Tower of London Test (TOL), and Digit Span. Diagnoses of mild cognitive impairment (MCI) and dementia were established according to DSM-5 criteria<sup>2</sup>, and diagnosis of dementia of the Alzheimer's type (DAT) was based on McKhann et al<sup>3</sup>. Biochemical, hematologic, and serologic analyses were performed to assess potential aetiologies and comorbidities, and neuroimaging was conducted at baseline and repeated whenever cognitive status changed. Final clinical diagnoses were determined in a consensus meeting that integrated medical, neuropsychological, laboratory, and neuroimaging data. All participants or family members (in case of participants with cognitive impairment) signed informed consent forms previously approved by the Local Ethics Committee (CAAE 68351023.6.0000.5149).

All participants had available CSF and/or plasma samples. Of these, 49 participants had only CSF samples available (cognitively unimpaired [CU], n=20; MCI, n=10; DAT, n=16; missing diagnosis, n=3), 239 had only plasma samples (CU, n=83; MCI, n=109; DAT, n=47), 45 had paired CSF-plasma samples collected within a 12-month interval, and 20 had unpaired CSF and plasma samples collected more than 12 months apart. For participants with both CSF and plasma samples, clinical diagnosis occasionally differed between the two collection time points, reflecting diagnostic updates or disease progression over time. This occurred both among participants with paired samples and those with samples collected more than 12 months apart. For analyses involving CSF biomarkers, diagnostic classification was based on the clinical diagnosis at the time of CSF collection; for analyses involving plasma biomarkers, the diagnosis at the plasma collection time point was used. Analyses requiring both CSF and plasma measures included only participants with paired samples ( $\leq 12$ -month interval), whereas individuals with unpaired samples were included exclusively in the CSF or plasma analyses, as appropriate.

GeNED.ar–Argentina. The GeNED.ar study (Genetics and Neuroimaging of Aging and Dementia in Argentina) is an ongoing study conducted at the Studies in Neuroscience and Complex Systems Unit (ENyS-CONICET) from Hospital El Cruce (HEC), National University Arturo Jauretche (UNAJ) in Florencio Varela, Buenos Aires, Argentina (<https://enys.conicet.gov.ar/genedar/>). Recruitment is carried out both in the general population and through a memory clinic. All participants (aged  $\geq 60$  years) undergo clinical, neuropsychological, and behavioural assessments, routine blood tests, and brain MRI scans. Results are reviewed in a weekly meeting integrated by physicians and neuropsychologists, where clinical diagnoses are reached by consensus following the criteria described by McKhann et al<sup>3</sup>.

Neuropsychological assessments include the Addenbrooke's Cognitive Examination Revised (ACE-R), MMSE, CDR, FAB, FAQ, Global Deteriorating Scale (GDS), and the Neuropsychiatric Inventory Questionnaire (NPI-Q). The study was approved by the HEC Research Ethics Committee (D00079), and all participants and/or family members provided written informed consent. A total of 134 participants were included in this study (CU, n=81; MCI, n=35; DAT, n=18), and all participants had available plasma samples. Participants with non-Alzheimer's dementia, other psychiatric disorders, history of head trauma, and/or cancer were excluded.

#### DNA analysis

Single nucleotide polymorphisms (SNPs) were genotyped using the Illumina Infinium Global Screening Array (GSA v1.0 with shared custom content and GSA-24 v3.0, for Cog-Aging-Study–Brazil and GeNED.ar–Argentina, respectively). Quality control (QC) and imputation were performed using PLINK 1.9 (<https://www.cog-genomics.org/plink/>), as previously described<sup>4–6</sup>. Briefly, samples with a call rate below 98%,

excess of heterozygosity, sex discrepancies, duplicates, or evidence of relatedness ( $PI-HAT > 0.2$ ) were excluded from the analysis. Variants with a call rate below 97%, a deviation from the Hardy-Weinberg equilibrium (HWE,  $p < 1 \times 10^{-6}$ ), or differential missingness between cases and controls were also removed. After QC, 148 samples from Cog-Aging-Study–Brazil and 126 samples from GeNED.ar–Argentina remained. To maximise genetic coverage, SNP imputation was performed on genome build GRCh38 using the Trans-Omics for Precision Medicine (TOPMed) imputation server<sup>7–9</sup>. Global ancestry was estimated as previously described<sup>5,6</sup>. Briefly, 356 autosomal Ancestry Informative Markers (AIMs), evenly distributed among chromosomes, were extracted from Cog-Aging-Study–Brazil and GeNED.ar–Argentina, as well as from reference populations in the 1000 Genomes Project (<http://www.internationalgenome.org/>): Europeans (CEU,  $n=85$ ), Africans (YRI,  $n=88$ ), and Native Americans (NAM,  $n=43$ ). All datasets were merged in one PLINK v1.9 file ([www.cog-genomics.org/plink/1.9/](http://www.cog-genomics.org/plink/1.9/)), and global ancestry was estimated using ADMIXTURE v1.3.0<sup>10</sup>.

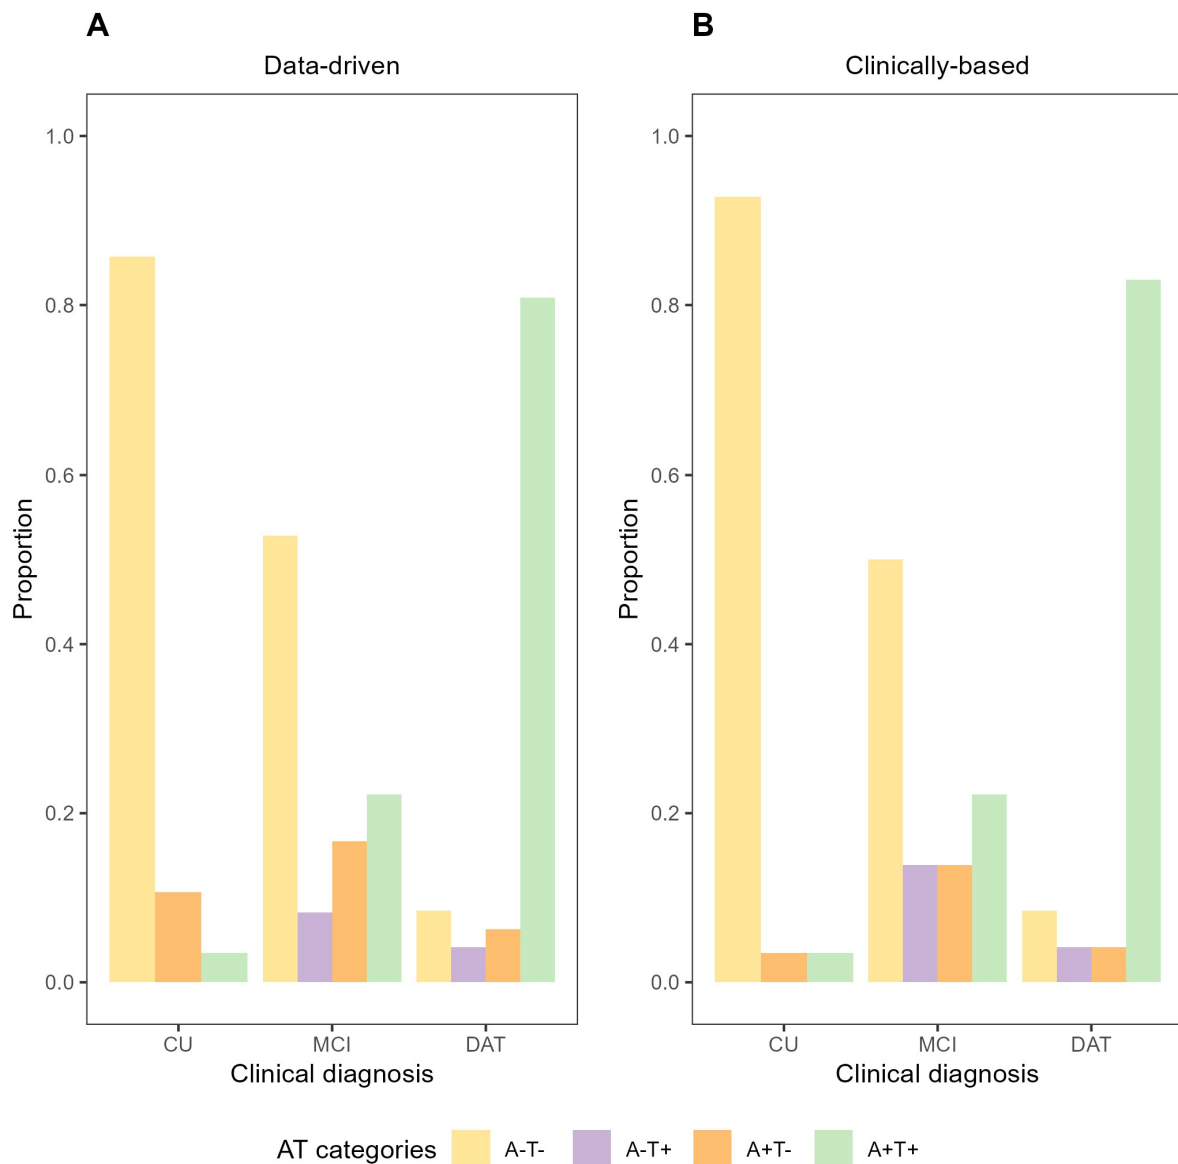

**Supplementary Figure 1. AT groups across clinical diagnostic groups in Cog-Aging-Study–Brazil.** Bar plots show the proportion of each AT group in each diagnostic group using either data-driven (a) or clinically-based (b) cut-offs for CSF A $\beta$ 42/A $\beta$ 40 and pTau181. CU, cognitively unimpaired; MCI, mild cognitive impairment; DAT, dementia of the Alzheimer’s type.

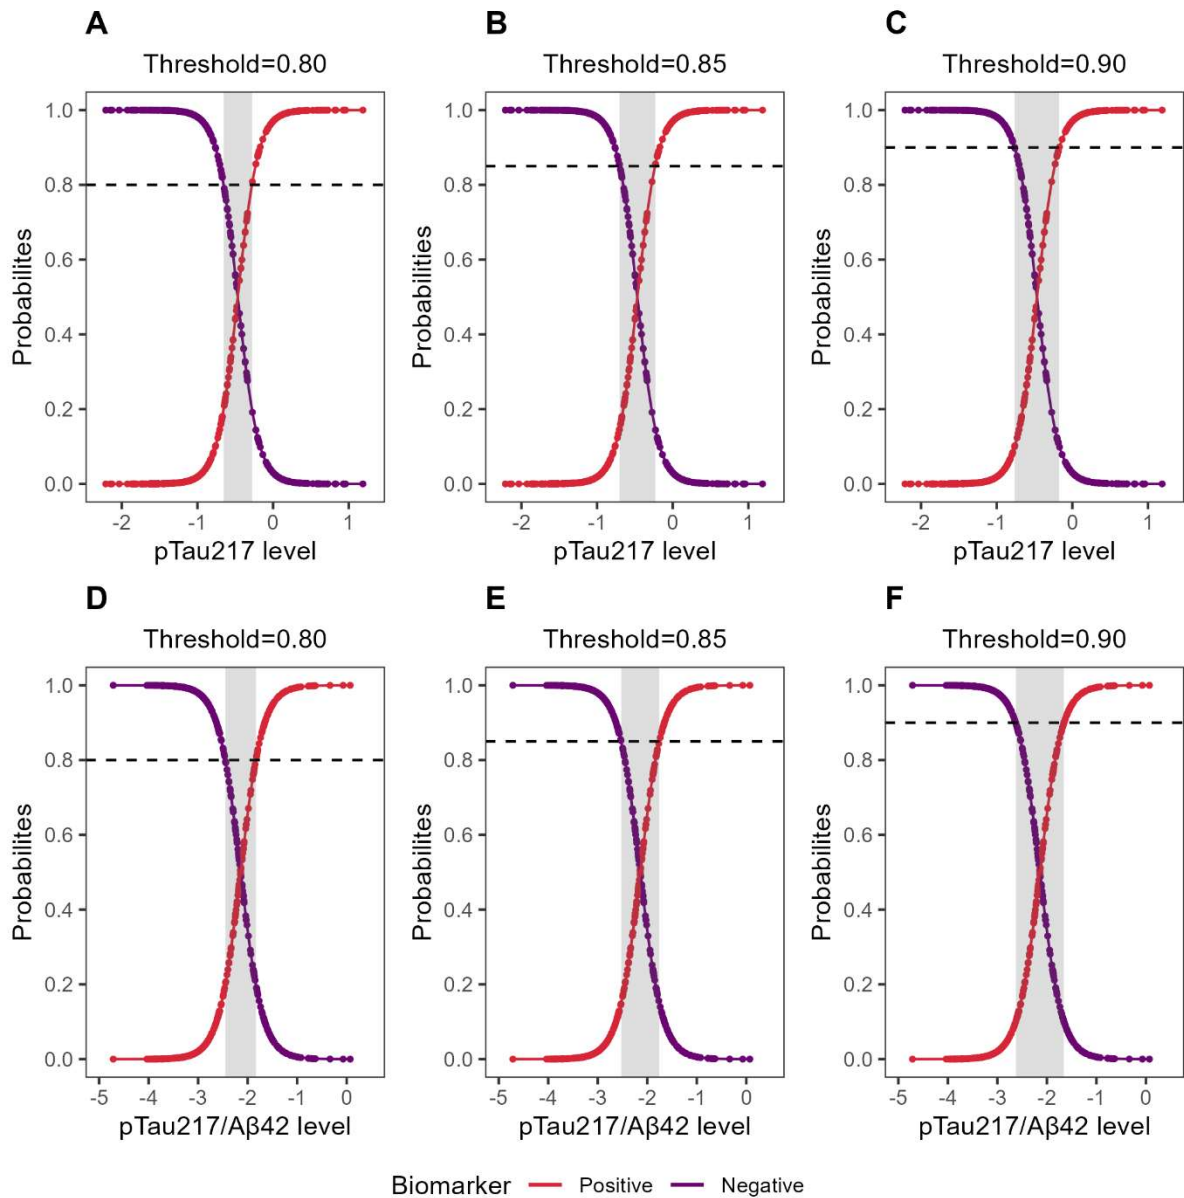

**Supplementary Figure 2. Class membership probabilities and indeterminate ranges for plasma pTau217 and pTau217/Aβ42 in Cog-Aging-Study–Brazil.** The purple line shows the probability of being classified as pTau217+ (a-c) or pTau217/Aβ42+ (d-f), and the red line shows the probability of being classified as pTau217- or pTau217/Aβ42- across biomarker levels. The grey shading indicates the range where classification was uncertain, defined by probability thresholds of <0.80 (a, d), <0.85 (b, e), or <0.90 (c, f). Plasma pTau217 and pTau217/Aβ42+ levels were log-transformed.

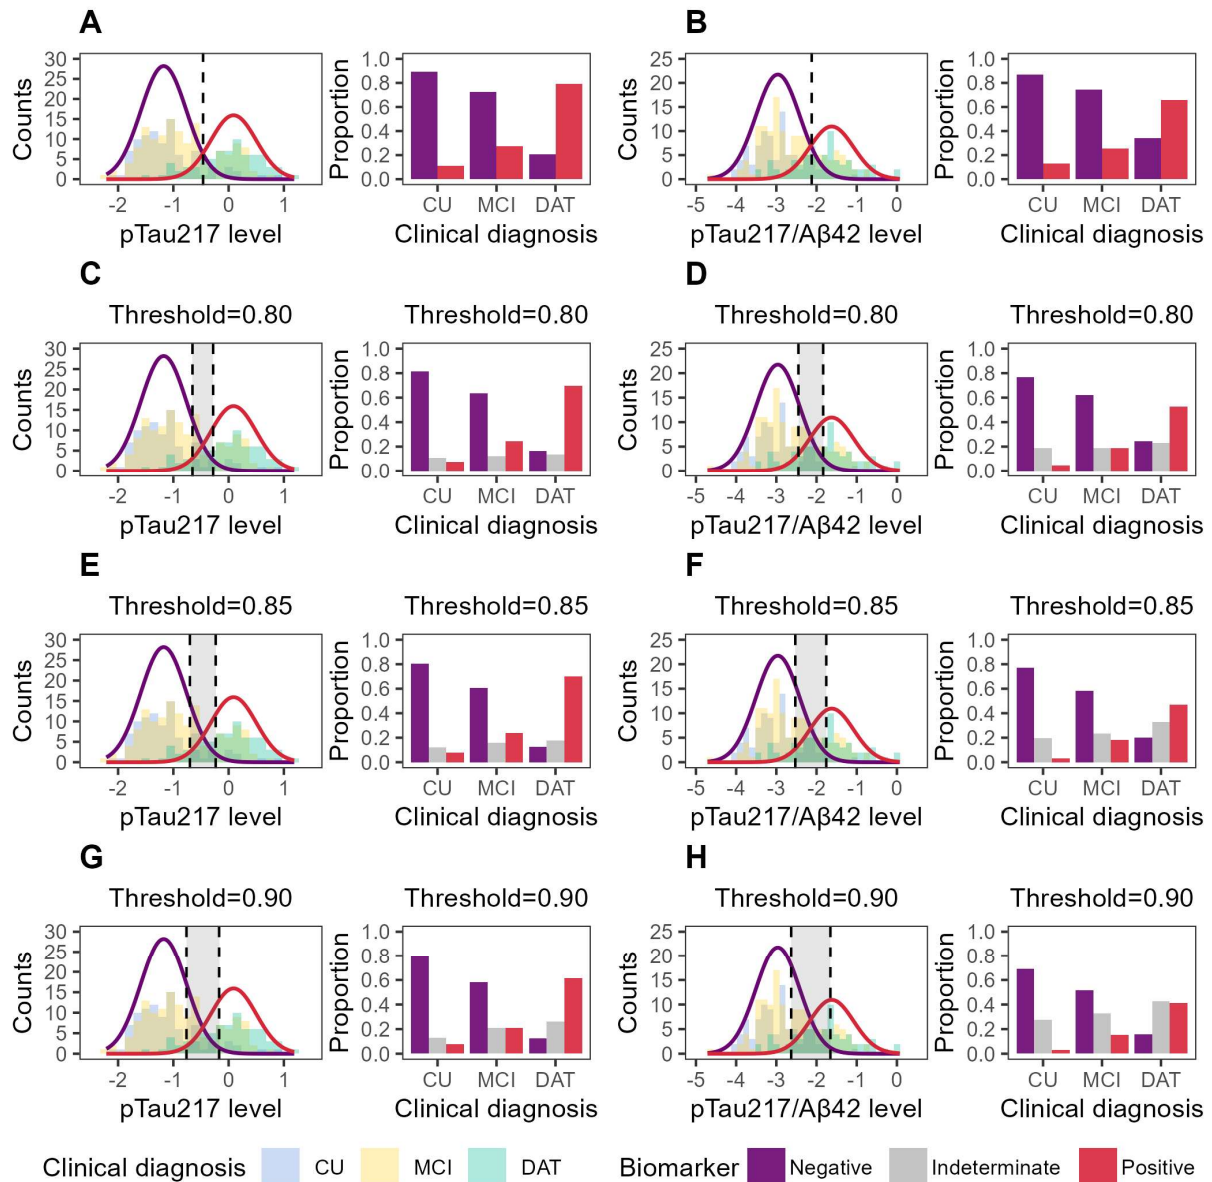

**Supplementary Figure 3. Extended data-driven cut-offs for plasma pTau217 and pTau217/A $\beta$ 42 in Cog-Aging-Study-Brazil.** This figure expands upon Figure 2. Histograms show the distribution of biomarker levels across clinical diagnostic groups, with overlaid curves representing the modelled distributions of normal and abnormal values. In panels a-b, values left of the dashed line indicate normal biomarker levels, and values to the right indicate abnormal levels. In panels c-h, the two dashed lines represent lower and upper cut-offs at probability thresholds of 0.80 (c-d), 0.85 (e-f), and 0.90 (g-h). Values left of the lower line are classified as normal, values right of the upper line as abnormal, and grey shading marks the intermediate range where status was uncertain. Bar plots display the proportion of each biomarker status (negative, indeterminate, positive) within diagnostic groups at each threshold. Plasma pTau217 and pTau217/A $\beta$ 42 values were log-transformed. CU, cognitively unimpaired; MCI, mild cognitive impairment; DAT, dementia of the Alzheimer's type.

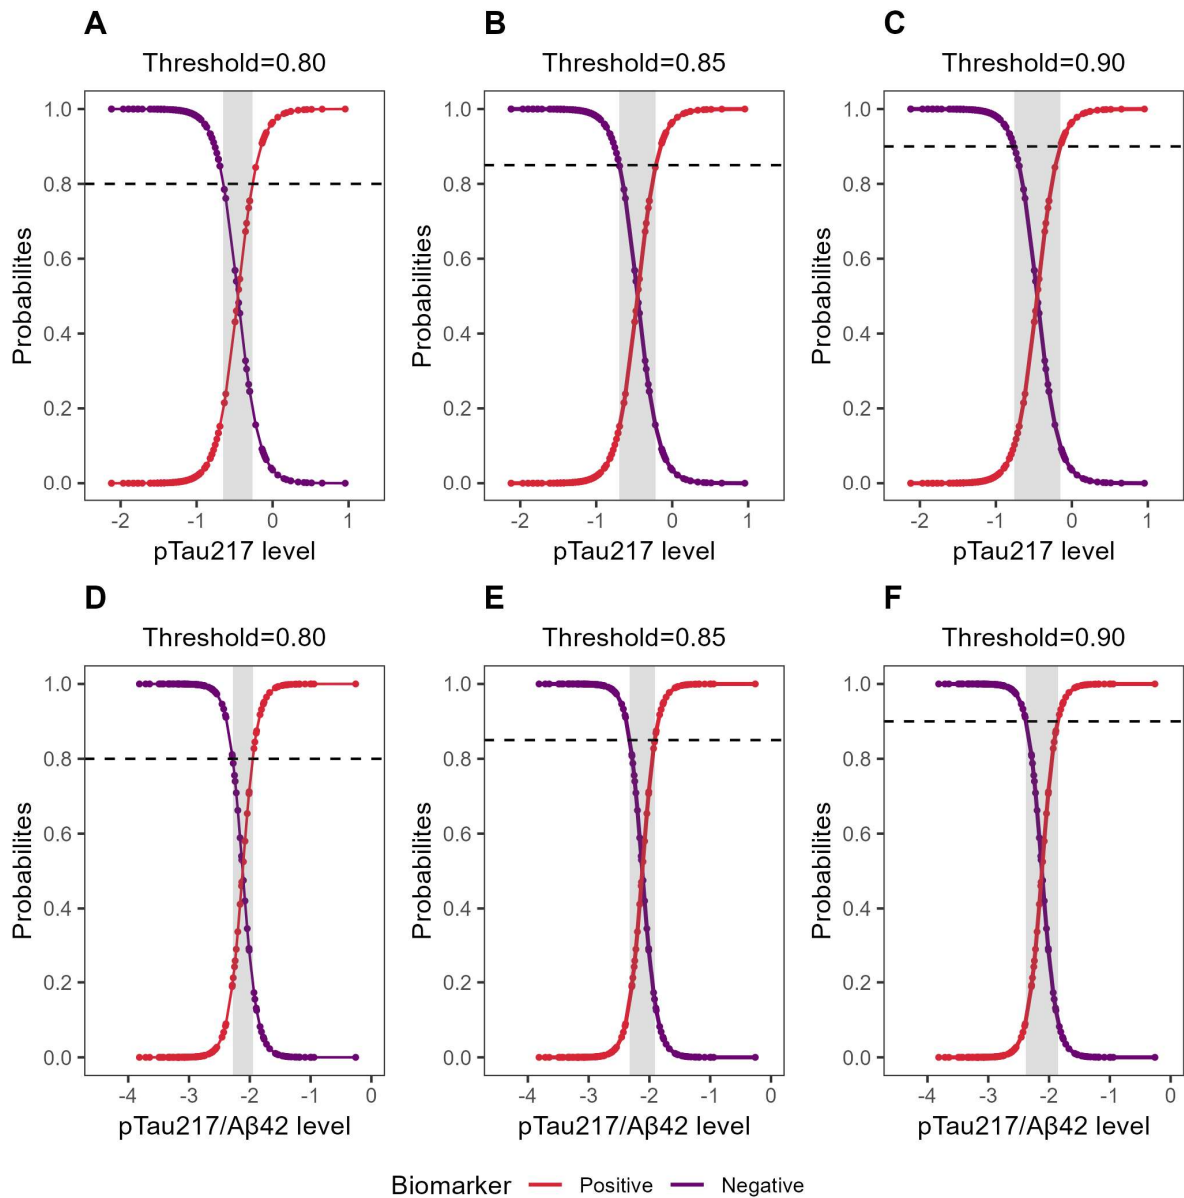

**Supplementary Figure 4. Class membership probabilities and indeterminate ranges for plasma pTau217 and pTau217/Aβ42 in GeNED.ar–Argentina.** The purple line shows the probability of being classified as pTau217+ (a-c) or pTau217/Aβ42+ (d-f), and the red line shows the probability of being classified as pTau217– or pTau217/Aβ42– across biomarker levels. The grey shading indicates the range where classification was uncertain, defined by probability thresholds of <0.80 (a, d), <0.85 (b, e), or <0.90 (c, f). Plasma pTau217 and pTau217/Aβ42+ levels were log-transformed.

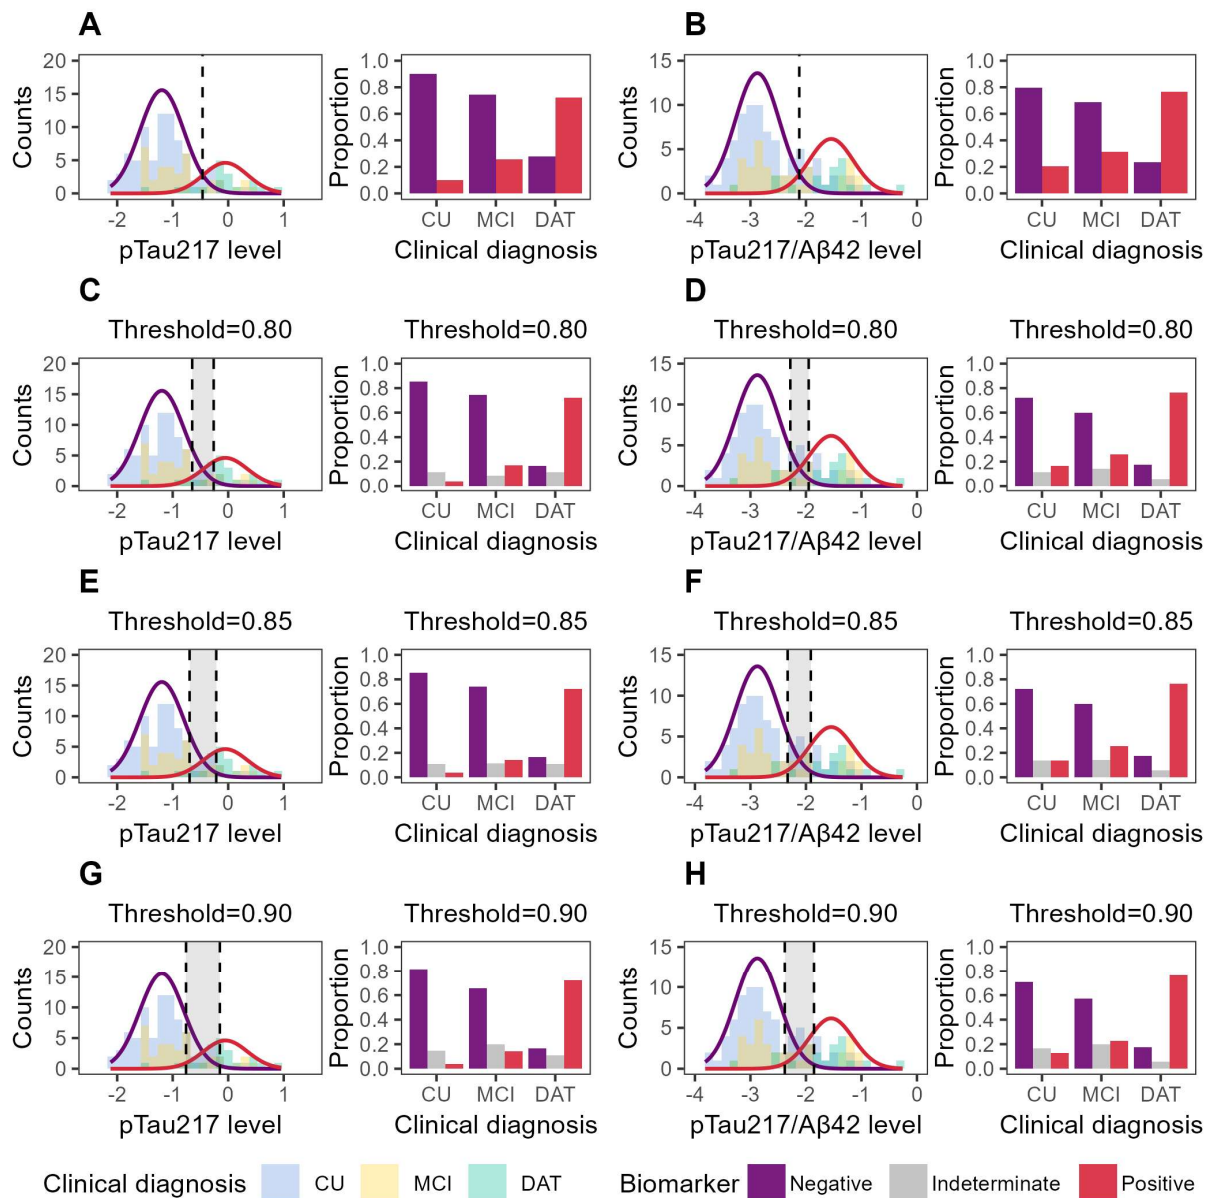

**Supplementary Figure 5. Extended data-driven cut-offs for plasma pTau217 and pTau217/A $\beta$ 42 in GeNED.ar-Argentina.** This figure expands upon Figure 2. Histograms show the distribution of biomarker levels across clinical diagnostic groups, with overlaid curves representing the modelled distributions of normal and abnormal values. In panels a-b, values left of the dashed line indicate normal biomarker levels, and values to the right indicate abnormal levels. In panels c-h, the two dashed lines represent lower and upper cut-offs at probability thresholds of 0.80 (c-d), 0.85 (e-f), and 0.90 (g-h). Values left of the lower line are classified as normal, values right of the upper line as abnormal, and grey shading marks the intermediate range where status was uncertain. Bar plots display the proportion of each biomarker status (negative, indeterminate, positive) within diagnostic groups at each threshold. Plasma pTau217 and pTau217/A $\beta$ 42 values were log-transformed. CU, cognitively unimpaired; MCI, mild cognitive impairment; DAT, dementia of the Alzheimer's type.



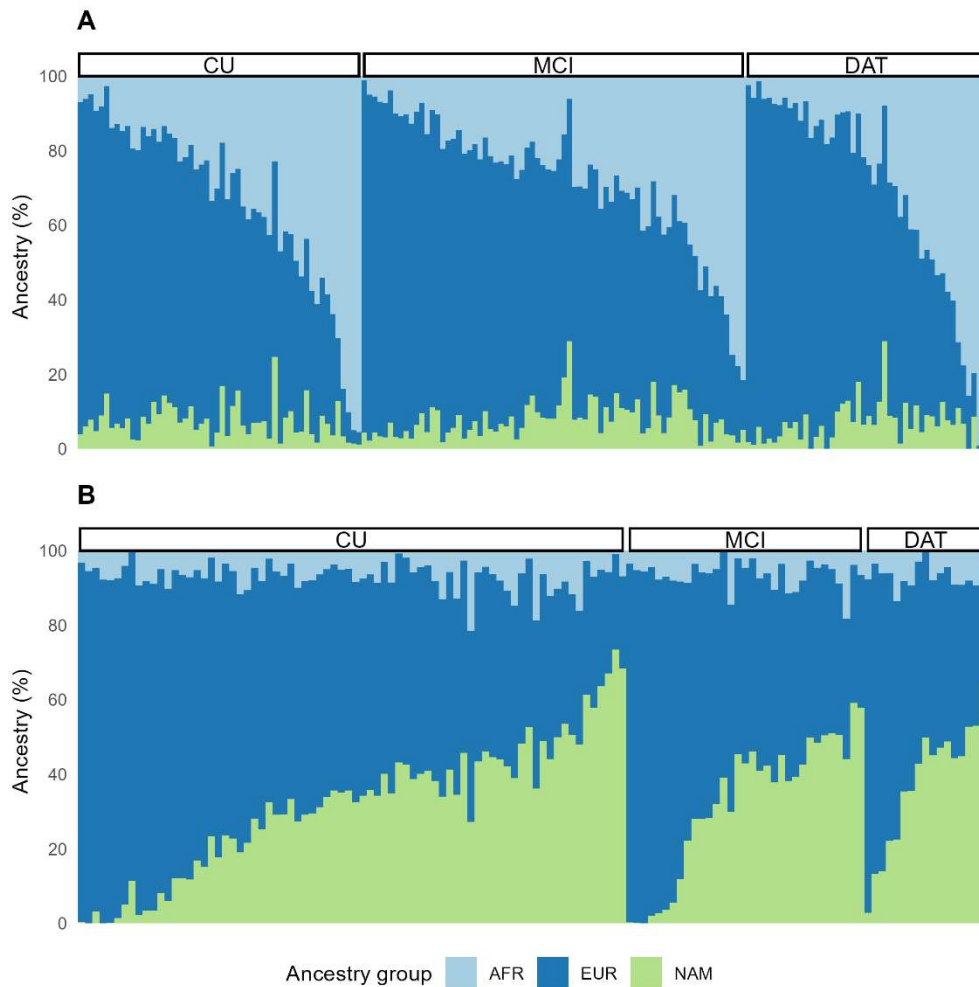

**Supplementary Figure 6. Genetic ancestry of participants from Cog-Aging-Study-Brazil and GeNED.ar-Argentina.** Each vertical bar represents one participant and shows individual admixture proportions for African (light blue), European (dark blue), and Native American (green) ancestry. Cog-Aging-Study-Brazil, n=173; GeNED.ar-Argentina, n=126. CU, cognitively unimpaired; MCI, mild cognitive impairment; DAT, dementia of the Alzheimer's type; AFR, African; EUR, European; NAM, Native American.

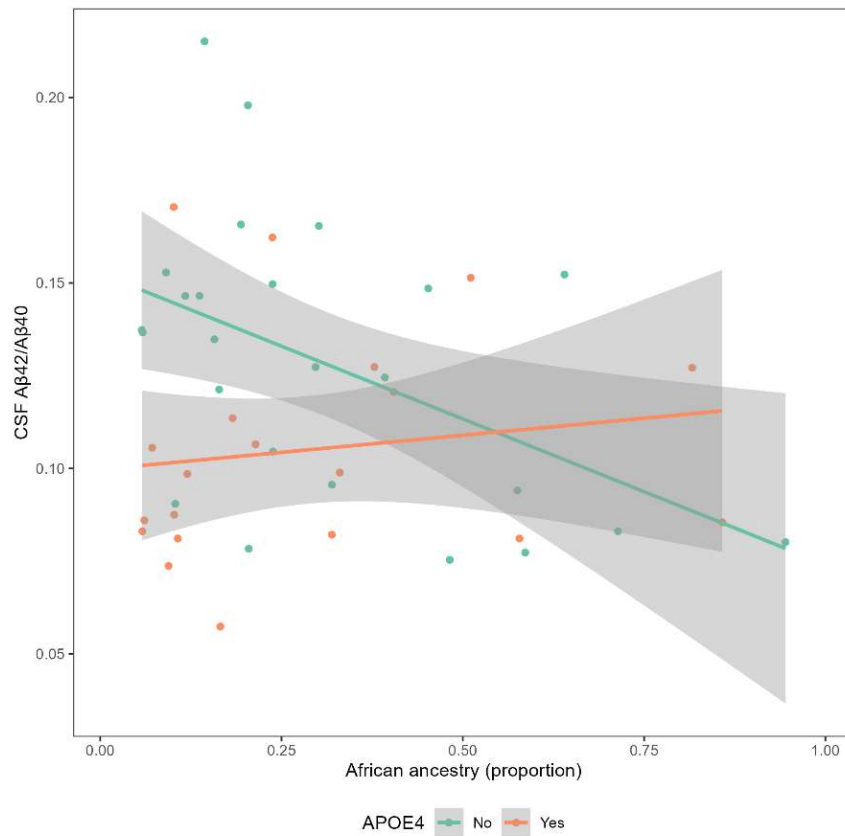

**Supplementary Figure 7. Effect of African ancestry on the association between *APOE-ε4* and amyloid pathology.** Dots show the association between global African ancestry and CSF Aβ42/Aβ40 levels (indicator of amyloid pathology) in *APOE-ε4* carriers (orange) and non-carriers (green). Trend lines were overlaid for visualisation purposes only.

**Supplementary Table 1. Model fit indices in Gaussian Mixture Modelling of CSF biomarkers in Cog-Aging-Study–Brazil.**

| CSF biomarker | Number of components | Variance structure | Log likelihood | BIC            | Means          | Variances                                                             | Proportions       |
|---------------|----------------------|--------------------|----------------|----------------|----------------|-----------------------------------------------------------------------|-------------------|
| Aβ42/Aβ40     | 1                    | Equal              | 206.67         | 403.86         | 403.86         | $1.56 \times 10^{-3}$                                                 | 1                 |
|               | 1                    | Varying            | 206.67         | 403.86         | 403.86         | $1.56 \times 10^{-3}$                                                 | 1                 |
|               | <b>2</b>             | <b>Equal</b>       | <b>218.18</b>  | <b>417.41</b>  | <b>405.1</b>   | <b><math>4.07 \times 10^{-4}</math></b>                               | <b>0.55; 0.45</b> |
|               | 2                    | Varying            | 220.03         | 416.37         | 401.99         | $2.47 \times 10^{-4}$ ; $6.41 \times 10^{-4}$                         | 0.48; 0.52        |
|               | 3                    | Equal              | 220.23         | 412.04         | 398.22         | $3.04 \times 10^{-4}$                                                 | 0.53; 0.42; 0.05  |
|               | 3                    | Varying            | 223.13         | 408.37         | 393.23         | $1.14 \times 10^{-4}$ ; $2.61 \times 10^{-5}$ ; $6.26 \times 10^{-4}$ | 0.35; 0.13; 0.53  |
| pTau181       | 1                    | Equal              | -91.7          | -192.88        | -192.88        | 4.23                                                                  | 0.29              |
|               | 1                    | Varying            | -91.7          | -192.88        | -192.88        | 4.23                                                                  | 0.29              |
|               | <b>2</b>             | <b>Equal</b>       | <b>-84.94</b>  | <b>-188.83</b> | <b>-203.38</b> | <b>3.8; 4.7</b>                                                       | <b>0.09</b>       |
|               | 2                    | Varying            | -84.94         | -193.56        | -208.08        | 3.8; 4.7                                                              | 0.09; 0.09        |
|               | 3                    | Equal              | -84.95         | -198.33        | -259.67        | 3.73; 3.98; 4.72                                                      | 0.08              |
|               | 3                    | Varying            | -82.65         | -203.19        | -228.39        | 3.65; 4.05; 4.69                                                      | 0.06; 0.01; 0.09  |

The model that fulfilled the criteria of best fit for each biomarker is highlighted in bold. Note that models with higher BIC are preferred using the formula implemented in *mclust* R package (see Methods). pTau181 levels were log-transformed. Aβ42/Aβ40-models, n=114; pTau181-models, n=114. BIC, Bayesian information criterion.

**Supplementary Table 2. Model fit indices in Gaussian Mixture Modelling of plasma biomarkers in Cog-Aging-Study–Brazil.**

| Plasma biomarker     | Number of components | Variance structure | Log likelihood | BIC            | Means               | Variances        | Proportions       |
|----------------------|----------------------|--------------------|----------------|----------------|---------------------|------------------|-------------------|
| pTau217              | 1                    | Equal              | -337.43        | -686.3         | -0.72               | 0.54             | 1                 |
|                      | 1                    | Varying            | -337.43        | -686.3         | -0.72               | 0.54             | 1                 |
|                      | <b>2</b>             | <b>Equal</b>       | <b>-314.66</b> | <b>-652.19</b> | <b>-1.18; 0.09</b>  | <b>0.17</b>      | <b>0.64; 0.36</b> |
|                      | 2                    | Varying            | -314.69        | -657.97        | -1.19; 0.07         | 0.16; 0.18       | 0.63; 0.37        |
|                      | 3                    | Equal              | -313.93        | -662.16        | -1.35; -0.77; 0.19  | 0.12             | 0.42; 0.28; 0.31  |
|                      | 3                    | Varying            | -313.48        | -672.7         | -1.44; -0.87; 0.12  | 0.09; 0.09; 0.15 | 0.34; 0.31; 0.35  |
| pTau217/A $\beta$ 42 | 1                    | Equal              | -369.17        | -749.74        | -2.51               | 0.7              | 1                 |
|                      | 1                    | Varying            | -369.17        | -749.74        | -2.51               | 0.7              | 1                 |
|                      | <b>2</b>             | <b>Equal</b>       | <b>-359.69</b> | <b>-742.17</b> | <b>-2.96; -1.62</b> | <b>0.3</b>       | <b>0.67; 0.33</b> |
|                      | 2                    | Varying            | -356.3         | -741.09        | -3.19; -2.16        | 0.13; 0.63       | 0.34; 0.66        |
|                      | 3                    | Equal              | -359.73        | -753.64        | -3.00; -2.89; -1.61 | 0.3              | 0.38; 0.3; 0.33   |
|                      | 3                    | Varying            | -356.34        | -758.26        | -3.19; -2.63; -1.87 | 0.13; 0.52; 0.5  | 0.33; 0.27; 0.4   |

The model that fulfilled the criteria of best fit for each biomarker is highlighted in bold. Note that models with higher BIC are preferred using the formula implemented in *mclust* R package (see Methods). If the BIC difference between two models was less than 5, the most parsimonious model was chosen. Biomarker levels were log-transformed. pTau217-models, n=304; pTau217/A $\beta$ 42-models, n=298. BIC, Bayesian information criterion.

**eTable 3. Model fit indices in Gaussian Mixture Modelling of plasma biomarkers in GeNED.ar–Argentina.**

| Plasma biomarker     | Number of components | Variance structure | Log likelihood | BIC            | Means               | Variances        | Proportions       |
|----------------------|----------------------|--------------------|----------------|----------------|---------------------|------------------|-------------------|
| pTau217              | 1                    | Equal              | -126.87        | -263.53        | -0.93               | 0.39             | 1                 |
|                      | 1                    | Varying            | -126.87        | -263.53        | -0.93               | 0.39             | 1                 |
|                      | <b>2</b>             | <b>Equal</b>       | <b>-118.75</b> | <b>-257.08</b> | <b>-1.20; -0.05</b> | <b>0.16</b>      | <b>0.77; 0.23</b> |
|                      | 2                    | Varying            | -118.69        | -261.86        | -1.22; -0.16        | 0.14; 0.21       | 0.73; 0.27        |
|                      | 3                    | Equal              | -118.79        | -266.96        | -1.31; -1.11; -0.04 | 0.15             | 0.3; 0.48; 0.22   |
|                      | 3                    | Varying            | -118           | -275.19        | -1.47; -1.00; -0.23 | 0.09; 0.04; 0.23 | 0.38; 0.3; 0.32   |
| pTau217/A $\beta$ 42 | 1                    | Equal              | -145.22        | -300.18        | -2.46               | 0.54             | 1                 |
|                      | 1                    | Varying            | -145.22        | -300.18        | -2.46               | 0.54             | 1                 |
|                      | <b>2</b>             | <b>Equal</b>       | <b>-130.85</b> | <b>-281.19</b> | <b>-2.88; -1.55</b> | <b>0.16</b>      | <b>0.69; 0.31</b> |
|                      | 2                    | Varying            | -129.67        | -283.72        | -2.96; -1.72        | 0.11; 0.27       | 0.6; 0.4          |
|                      | 3                    | Equal              | -130.86        | -290.96        | -2.90; -2.85; -1.54 | 0.16             | 0.37; 0.32; 0.31  |
|                      | 3                    | Varying            | -129.5         | -297.99        | -3.08; -2.85; -1.77 | 0.1; 0.06; 0.29  | 0.31; 0.26; 0.43  |

The model that fulfilled the criteria of best fit for each biomarker is highlighted in bold. Note that models with higher BIC are preferred using the formula implemented in *mclust* R package (see Methods). Biomarker levels were log-transformed. pTau217-models, n=134; pTau217/A $\beta$ 42-models, n=131. BIC, Bayesian information criterion.

**eTable 4. Genetic ancestry in Cog-Aging-Study–Brazil and GeNED.ar–Argentina.**

| <b>Ancestry group (proportion)</b> | <b>Cog-Aging-Study–Brazil<br/>(n=173)</b> | <b>GeNED.ar–Argentina<br/>(n=126)</b> |
|------------------------------------|-------------------------------------------|---------------------------------------|
| African (mean, SD)                 | 0.30 (0.22)                               | 0.07 (0.04)                           |
| European (mean, SD)                | 0.62 (0.22)                               | 0.61 (0.18)                           |
| Native American (mean, SD)         | 0.07 (0.05)                               | 0.33 (0.18)                           |

Values represent the mean (SD) proportion of genetic ancestry components estimated for each cohort. SD, standard deviation.

## References

1. de Paula JJ, Bertola L, Ávila RT, et al. Clinical Applicability and Cutoff Values for an Unstructured Neuropsychological Assessment Protocol for Older Adults with Low Formal Education. Herholz K, ed. *PLoS One*. 2013;8(9):e73167. doi:10.1371/journal.pone.0073167
2. American Psychiatric Association. *Diagnostic and Statistical Manual of Mental Disorders*. American Psychiatric Association Publishing; 2022. doi:10.1176/appi.books.9780890425787
3. McKhann GM, Knopman DS, Chertkow H, et al. The diagnosis of dementia due to Alzheimer's disease: Recommendations from the National Institute on Aging-Alzheimer's Association workgroups on diagnostic guidelines for Alzheimer's disease. *Alzheimer's Dement*. 2011;7(3):263-269. doi:10.1016/j.jalz.2011.03.005
4. Marees AT, de Kluiver H, Stringer S, et al. A tutorial on conducting genome-wide association studies: Quality control and statistical analysis. *Int J Methods Psychiatr Res*. 2018;27(2). doi:10.1002/mpr.1608
5. Dalmaso MC, Brusco LI, Olivar N, et al. Transethnic meta-analysis of rare coding variants in PLCG2, ABI3, and TREM2 supports their general contribution to Alzheimer's disease. *Transl Psychiatry*. 2019;9(1):55. doi:10.1038/s41398-019-0394-9
6. Dalmaso MC, de Rojas I, Olivar N, et al. The first genome-wide association study in the Argentinian and Chilean populations identifies shared genetics with Europeans in Alzheimer's disease. *Alzheimer's Dement*. 2024;20(2):1298-1308. doi:10.1002/alz.13522
7. Taliun D, Harris DN, Kessler MD, et al. Sequencing of 53,831 diverse genomes from the NHLBI TOPMed Program. *Nature*. 2021;590(7845):290-299. doi:10.1038/s41586-021-03205-y
8. Das S, Forer L, Schönherr S, et al. Next-generation genotype imputation service and methods. *Nat Genet*. 2016;48(10):1284-1287. doi:10.1038/ng.3656
9. Fuchsberger C, Abecasis GR, Hinds DA. minimac2: faster genotype imputation. *Bioinformatics*. 2015;31(5):782-784. doi:10.1093/bioinformatics/btu704
10. Alexander DH, Novembre J, Lange K. Fast model-based estimation of ancestry in unrelated individuals. *Genome Res*. 2009;19(9):1655-1664. doi:10.1101/gr.094052.109
